# Supplementary material for: A multispecies competitive nanobody-based ELISA for the detection of antibodies against hepatitis E virus
Source: Springer Nature journal article supplement (doi:10.1038/s41598-023-41955-z), 2023-09-18
Supplement: MOESM1 [file 41598_2023_41955_MOESM1_ESM.pdf]

# **A MULTISPECIES COMPETITIVE NANOBODY-BASED ELISA FOR THE DETECTION OF ANTIBODIES AGAINST HEPATITIS E VIRUS**

Lorena Paola Arce<sup>1,2</sup>, María Florencia Pavan<sup>2</sup>, Marina Bok<sup>3</sup>, Silvina Elena Gutiérrez<sup>4</sup>, Silvia Marcela Estein<sup>4</sup>, Agostina Tammone Santos<sup>4</sup>; Walter Ezequiel Condorí<sup>4</sup>; Marcela María Uhart<sup>5</sup>, Viviana Parreño<sup>3</sup>, María Guadalupe Vizoso-Pinto<sup>1,\*,\*</sup> & Lorena Itatí Ibañez<sup>2,\*,\*</sup>

<sup>1</sup> Infection Biology Laboratory, Faculty of Medicine and Instituto Superior de Investigaciones Biológicas (INSIBIO), CONICET-UNT, Tucumán, T4000ILI, Argentina

<sup>2</sup> Laboratorio de Ingeniería de Anticuerpos. Instituto de Química, Física de los Materiales, Medio ambiente y Energía (INQUIMAE- CONICET), Ciudad Autónoma de Buenos Aires, C1428EGA, Argentina

<sup>3</sup> InculINTA, Instituto de Virología, Instituto Nacional de Tecnología Agropecuaria (INTA), Husrlingham, 1686, Argentina

<sup>4</sup> Universidad Nacional del Centro de la Provincia de Buenos Aires, Facultad de Ciencias Veterinarias, Núcleo SAMP. Centro de Investigación Veterinaria de Tandil (UNCPBA-CICPBA-CONICET), Tandil, Buenos Aires, B7000GHG, Argentina

<sup>5</sup> One Health Institute, School of Veterinary Medicine, University of California Davis, Davis 95616, California, USA

\*Correspondence to: Dr. María Guadalupe Vizoso-Pinto Email: mgvizoso@fm.unt.edu.ar

\*Correspondence to: Dr. Lorena Itatí Ibañez Email: loreitati@gmail.com

+ These authors contributed equally to this work

## Supplementary Information

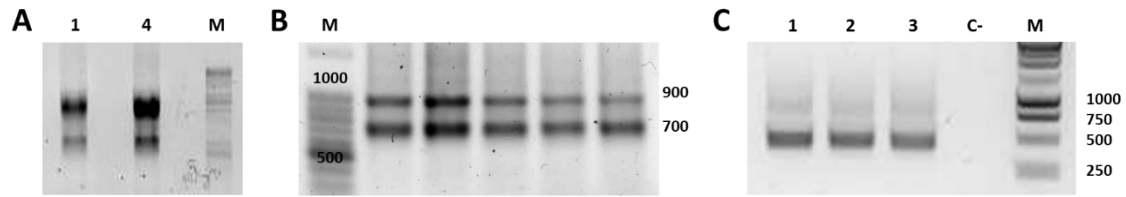

**Supplementary Figure S1.** Construction of an immune Nb library. **(A)** Total RNA extracted from llama lymphocytes (sample 1 and 4) was reversed transcribed into cDNA and used as templates for the nested PCR. **(B)** First PCR, a fragment of ~700 bp representing the heavy chain-only antibody repertoire and a fragment of 1,000 bp corresponding to the heavy chain of the conventional antibodies were obtained. **(C)** The band of 700 bp was isolated and used as template for the second PCR, a fragment of 400 bp, corresponding to the VHHs was observed.

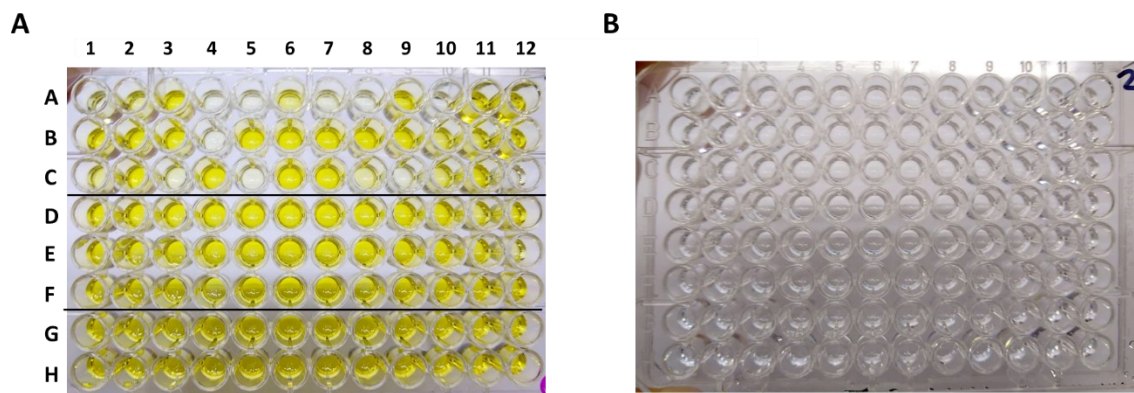

**Supplementary Figure S2.** Screening of specific Nbs against HEV-3 ORF2 protein extracted from periplasm of infected TG1 bacteria. **(A)** ELISA on a plate coated HEV-3 ORF2 protein. **(B)** ELISA on a plate coated with an irrelevant protein (negative control). Specific reaction was developed using horseradish peroxidase (HRP)-linked anti-HA antibody and the TMB substrate. Colonies were picked from agar plates seeded with infected TG1 after different round of panning and elution strategies as follows: A1-A12 and B1-B4 (first round of panning - cell elution); B5-B12 and C1-C12 (first round of panning - trypsin elution); D1-D12 and E1-E4 (second round of panning - cell elution); E5-E12 and F1-F12 (second round of panning - trypsin elution); G1-G12 and H1-H6 (third round of panning - trypsin elution) and H6-H12 (third round of panning – cell elution).

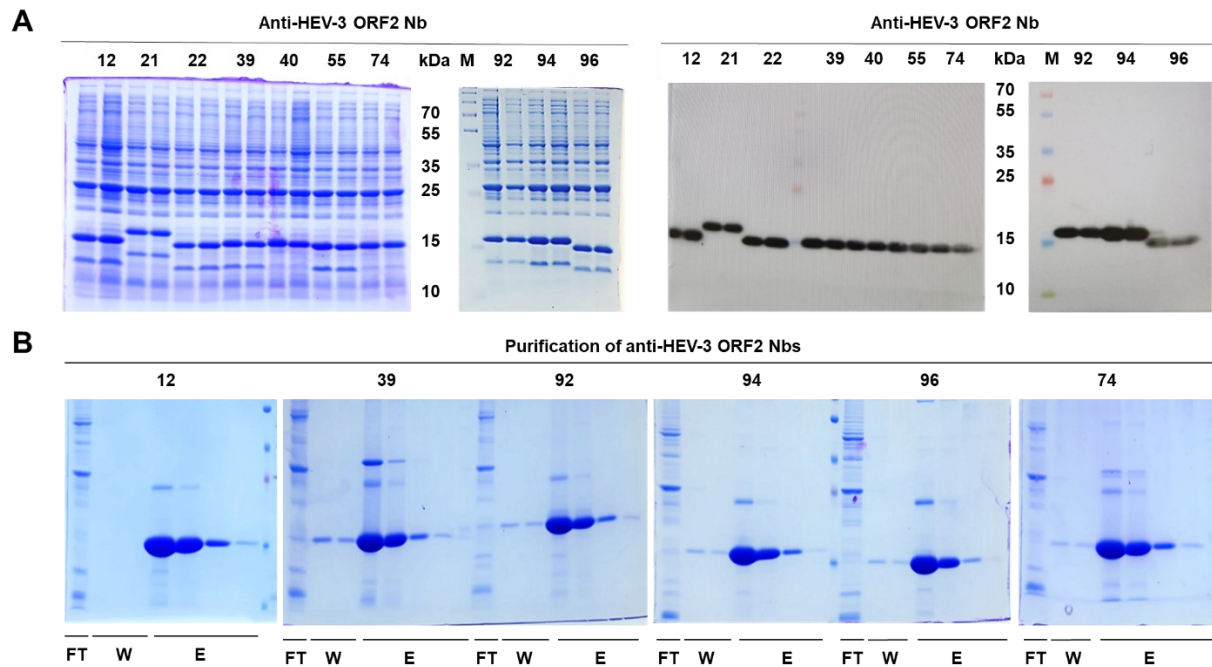

**Supplementary Figure S3.** Expression and purification of anti-HEV-3 ORF2 Nbs. **(A)** Ten Nbs (two different clones for each Nb) were analyzed by SDS-PAGE and Western blot, proteins with small differences in size were observed. **(B)** Purification of 6 Nbs by affinity chromatography (Ni-NTA resin), FT: flow through, W: wash, and E: elution.

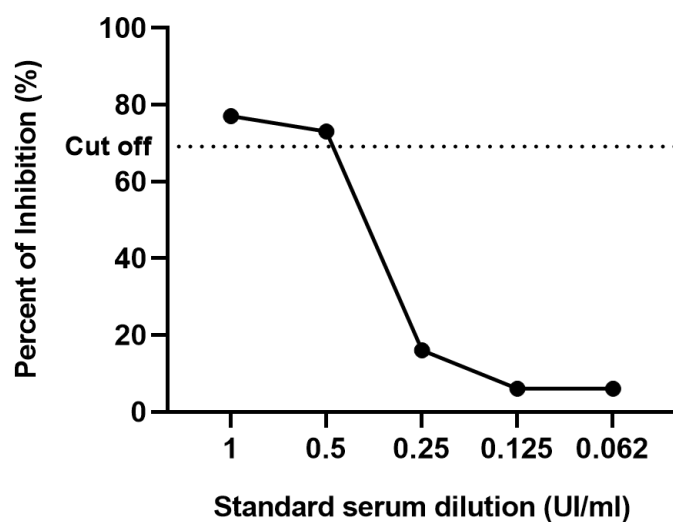

**Supplementary Figure S4.** Limit of detection of the cELISA. Standard serum for HEV antibodies was diluted and analyzed by developed cELISA.

**Supplementary Table 1 Determination of the positive/negative ratio to select the optimal conditions of a novel cELISA for human and swine sera**

| Antigen<br>HEV-3 ORF2 | 0.05 ug/ml |       |       | 0.1 ug/ml |       |       | 0.2 ug/ml |       |       |
|-----------------------|------------|-------|-------|-----------|-------|-------|-----------|-------|-------|
|                       | Undiluted  | 1/2   | 1/4   | Undiluted | 1/2   | 1/4   | Undiluted | 1/2   | 1/4   |
| Human                 |            |       |       |           |       |       |           |       |       |
| Positive 1            | 0.097      | 0.264 | 0.424 | 0.363     | 0.639 | 1.546 | 0.900     | 1.277 | 1.487 |
| Negative 1            | 1.264      | 1.374 | 1.424 | 1.770     | 1.795 | 1.783 | 1.869     | 1.793 | 1.866 |
| P/N                   | 0.077      | 0.192 | 0.298 | 0.205     | 0.356 | 0.867 | 0.482     | 0.712 | 0.797 |
| Positive 2            | 0.004      | 0.057 | 0.040 | 0.001     | 0.011 | 0.108 | -0.001    | 0.143 | 0.567 |
| Negative 2            | 0.966      | 1.103 | 1.316 | 1.592     | 1.649 | 1.799 | 1.755     | 1.756 | 1.858 |
| P/N                   | 0.005      | 0.052 | 0.031 | 0.001     | 0.007 | 0.06  | -0.001    | 0.081 | 0.305 |
| Swine                 |            |       |       |           |       |       |           |       |       |
| Positive 1            | 0.128      | 0.201 | 0.384 | 0.151     | 0.288 | 0.548 | 0.794     | 1.122 | 1.417 |
| Negative 1            | 1.111      | 1.162 | 1.136 | 1.214     | 1.326 | 1.254 | 1.813     | 1.774 | 1.686 |
| P/N                   | 0.115      | 0.173 | 0.338 | 0.124     | 0.217 | 0.437 | 0.438     | 0.632 | 0.840 |
| Positive 2            | 0.069      | 0.081 | 0.123 | 0.068     | 0.074 | 0.098 | 0.132     | 0.249 | 0.654 |
| Negative 1            | 1.111      | 1.162 | 1.136 | 1.214     | 1.326 | 1.254 | 1.813     | 1.774 | 1.686 |
| P/N                   | 0.062      | 0.070 | 0.108 | 0.056     | 0.056 | 0.078 | 0.073     | 0.140 | 0.387 |

**Supplementary Table 2 Reproducibility of novel cELISA**

| Intra-assay coefficient of variance (CV) |       |       |       |         |       |       |       |
|------------------------------------------|-------|-------|-------|---------|-------|-------|-------|
| Serum                                    | Abs 1 | Abs 2 | Abs 3 | Abs 4   | Mean  | SD    | CV%   |
| Positive 1                               | 0.472 | 0.473 | 0.464 | 0.476   | 0.471 | 0.010 | 1.090 |
| Positive 2                               | 0.136 | 0.137 | 0.130 | 0.141   | 0.136 | 0.000 | 3.340 |
| Positive 3                               | 0.051 | 0.054 | 0.054 | 0.054   | 0.053 | 0.000 | 2.820 |
| Positive 4                               | 0.039 | 0.039 | 0.042 | 0.039   | 0.039 | 0.000 | 3.770 |
| Positive 5                               | 0.045 | 0.045 | 0.044 | 0.044   | 0.044 | 0.000 | 1.300 |
| Positive 6                               | 0.048 | 0.044 | 0.046 | 0.044   | 0.045 | 0.000 | 4.210 |
| Positive 7                               | 0.201 | 0.198 | 0.204 | 0.198   | 0.200 | 0.000 | 1.430 |
| Positive 8                               | 0.051 | 0.048 | 0.052 | 0.048   | 0.049 | 0.000 | 4.140 |
| Positive 9                               | 0.041 | 0.045 | 0.046 | 0.042   | 0.043 | 0.000 | 5.470 |
| Negative1                                | 1.695 | 1.544 | 1.749 | No data | 1.662 | 0.110 | 6.390 |
| Negative 2                               | 1.759 | 1.686 | 1.812 | No data | 1.752 | 0.060 | 3.610 |
| Negative 3                               | 1.860 | 1.774 | 1.736 | No data | 1.790 | 0.060 | 3.550 |
| Negative 4                               | 1.643 | 1.581 | 1.581 | 1.513   | 1.579 | 0.050 | 3.360 |
| Negative 5                               | 1.533 | 1.718 | 1.601 | 1.666   | 1.629 | 0.080 | 4.920 |
| Negative 6                               | 1.612 | 1.632 | 1.688 | No data | 1.644 | 0.040 | 2.400 |
| Negative 7                               | 1.653 | 1.766 | 1.847 | 1.742   | 1.752 | 0.080 | 4.560 |
| Negative 8                               | 1.495 | 1.444 | 1.513 | 1.447   | 1.474 | 0.030 | 2.350 |
| Negative 9                               | 1.624 | 1.617 | 1.581 | No data | 1.607 | 0.020 | 1.440 |

| Inter-assay coefficient of variance (CV) |       |       |       |       |       |       |       |       |        |
|------------------------------------------|-------|-------|-------|-------|-------|-------|-------|-------|--------|
| Serum                                    | Abs 1 | Abs 2 | Abs 3 | Abs 4 | Abs 5 | Abs 6 | Mean  | SD    | CV%    |
| Positive 1                               | 0.145 | 0.160 | 0.137 | 0.124 | 0.127 | 0.146 | 0.139 | 0.010 | 9.570  |
| Positive 2                               | 0.052 | 0.062 | 0.064 | 0.055 | 0.067 | 0.068 | 0.061 | 0.010 | 10.600 |
| Negative1                                | 1.812 | 1.860 | 1.825 | 1.782 | 1.792 | 1.856 | 1.821 | 0.030 | 1.770  |
| Negative 2                               | 1.014 | 1.250 | 1.345 | 1.285 | 1.26  | 1.02  | 1.195 | 0.150 | 12.130 |

**Supplementary Table 3 Agreements of the cELISA with a commercial ELISA with samples from different species**

| Commercial ELISA              |             |          |          |       |
|-------------------------------|-------------|----------|----------|-------|
|                               |             | Positive | Negative | Total |
| <b>cELISA<br/>(human)</b>     | Positive    | 5        | 0        | 5     |
|                               | Negative    | 0        | 59       | 59    |
|                               | Total       | 5        | 59       | 64    |
|                               | Sensitivity | 100 %    |          |       |
|                               | Specificity | 100 %    |          |       |
| <b>cELISA<br/>(swine)</b>     | Positive    | 55       | 2        | 57    |
|                               | Negative    | 1        | 58       | 59    |
|                               | Total       | 56       | 60       | 116   |
|                               | Sensitivity | 98.21 %  |          |       |
|                               | Specificity | 96.67 %  |          |       |
| <b>cELISA<br/>(wild boar)</b> | Positive    | 8        | 0        | 8     |
|                               | Negative    | 0        | 14       | 14    |
|                               | Total       | 8        | 14       | 22    |
|                               | Sensitivity | 100 %    |          |       |
|                               | Specificity | 100 %    |          |       |
| <b>cELISA<br/>(deer)</b>      | Positive    | 1        | 0        | 1     |
|                               | Negative    | 0        | 19       | 19    |
|                               | Total       | 1        | 19       | 20    |
|                               | Sensitivity | 100 %    |          |       |
|                               | Specificity | 100 %    |          |       |
| <b>cELISA<br/>(dog)</b>       | Positive    | 0        | 0        | 0     |
|                               | Negative    | 1        | 19       | 20    |
|                               | Total       | 1        | 19       | 20    |
|                               | Sensitivity | 0 %      |          |       |
|                               | Specificity | 100 %    |          |       |
| <b>cELISA<br/>(mice)</b>      | Positive    | 3        | 0        | 3     |
|                               | Negative    | 0        | 2        | 2     |
|                               | Total       | 3        | 2        | 5     |
|                               | Sensitivity | 100 %    |          |       |
|                               | Specificity | 100 %    |          |       |

## Unmodified gels

**Supplementary Figure S1.**

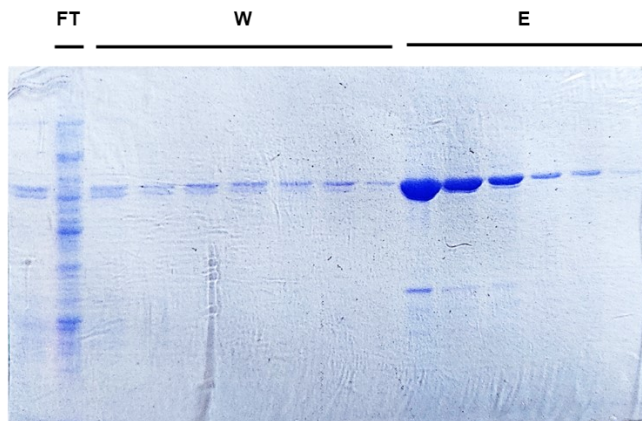

**(A)** SDS-PAGE and Coomassie blue staining showing the expression and purification of the recombinant HEV-3 ORF2 protein. FT: flow through, W: wash, and E: elution.

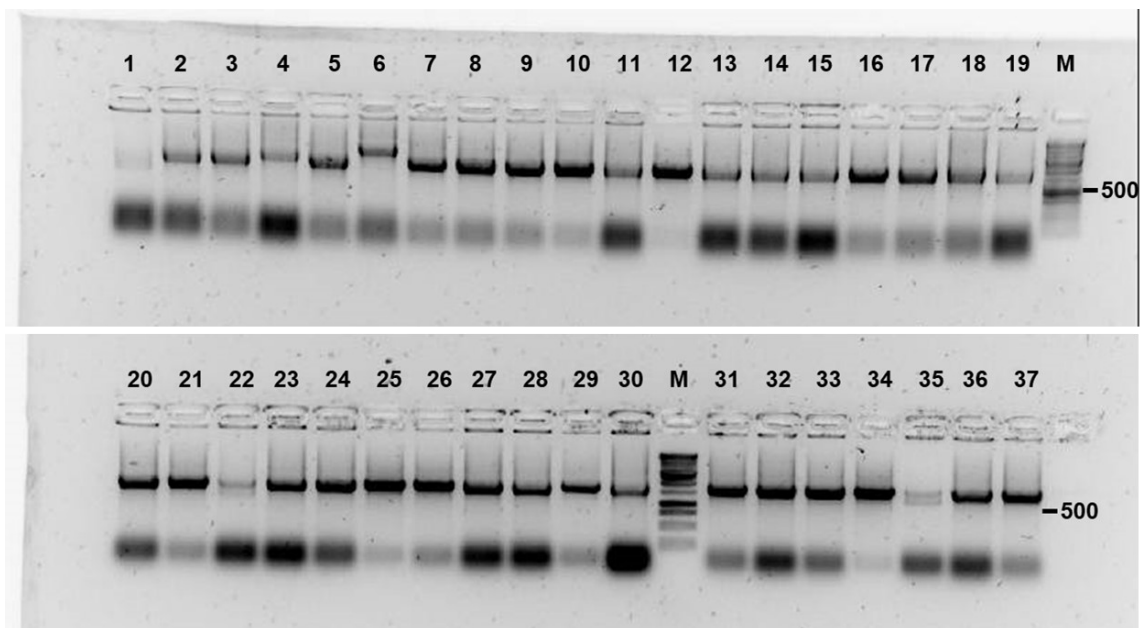

**(D)** Agarose gel showing the ~700 bp PCR fragments corresponding to VHs of variable size amplified from randomly picked individual colonies.

**Supplementary Figure S2.**

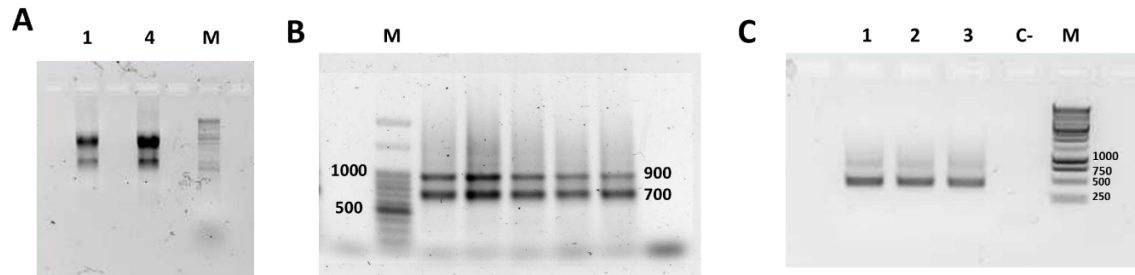

(A) Total RNA extracted from llama lymphocytes (sample 1 and 4) was reversed transcribed into cDNA and used as templates for the nested PCR.

(B) First PCR, a fragment of ~700 bp representing the heavy chain-only antibody repertoire and a fragment of 1,000 bp corresponding to the heavy chain of the conventional antibodies were obtained.

(C) The band of 700 bp was isolated and used as template for the second PCR, a fragment of 400 bp, corresponding to the VHs was observed.

#### Supplementary Figure S4.

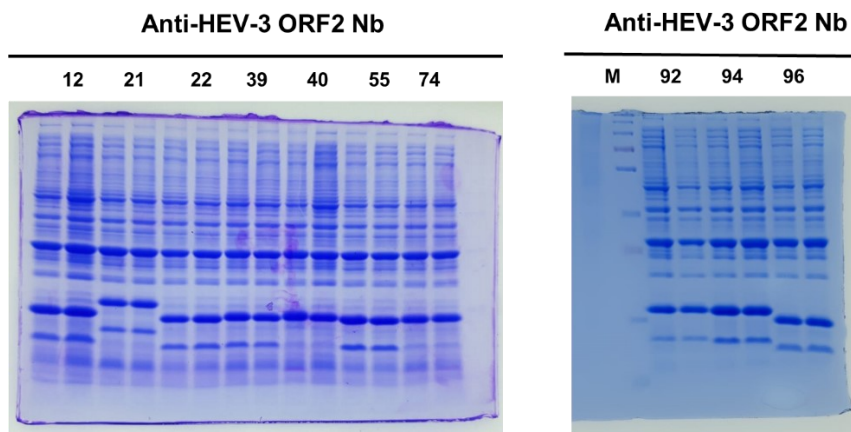

(A) Ten Nbs (two different clones for each Nb) were analyzed by SDS-PAGE and Western blot, proteins with small differences in size were observed.

# Purification of anti-HEV-3 ORF2 Nbs

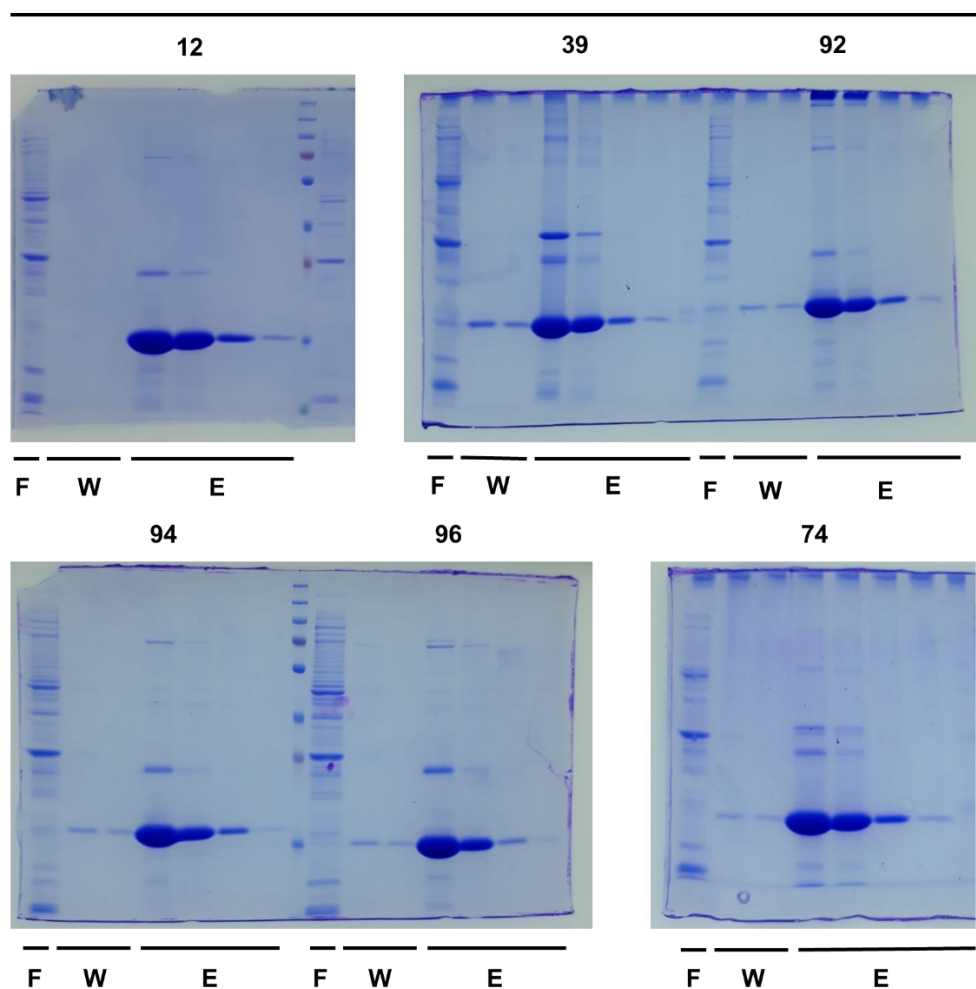

**(B)** Purification of 6 Nbs by affinity chromatography (Ni-NTA resin), FT: flow through, W: wash, and E: elution.
